# Supplementary material for: Inhibiting serotonin signaling through HTR2B in visceral adipose tissue improves obesity-related insulin resistance
Source: JCI journal article supplement (doi:10.1172/jci145331), 2021-10-07
Supplement: sd1 [file 1]

## **Supplemental data**

### **Inhibiting serotonin signaling through HTR2B in visceral adipose tissue improves obesity related insulin resistance**

Won Gun Choi<sup>1, #</sup>, Wonsuk Choi<sup>1, 2, #</sup>, Tae Jung Oh<sup>3, #</sup>, Hye-Na Cha<sup>4</sup>, Inseon Hwang<sup>1</sup>, Yun Kyung Lee<sup>5</sup>, Seung Yeon Lee<sup>1</sup>, Hyemi Shin<sup>1</sup>, Ajin Lim<sup>1</sup>, Dongryeol Ryu<sup>6</sup>, Jae Myoung Suh<sup>1</sup>, So-Young Park<sup>4, \*</sup>, Sung Hee Choi<sup>3, 5, \*</sup> and Hail Kim<sup>1, \*</sup>

Supplemental Figure 1.

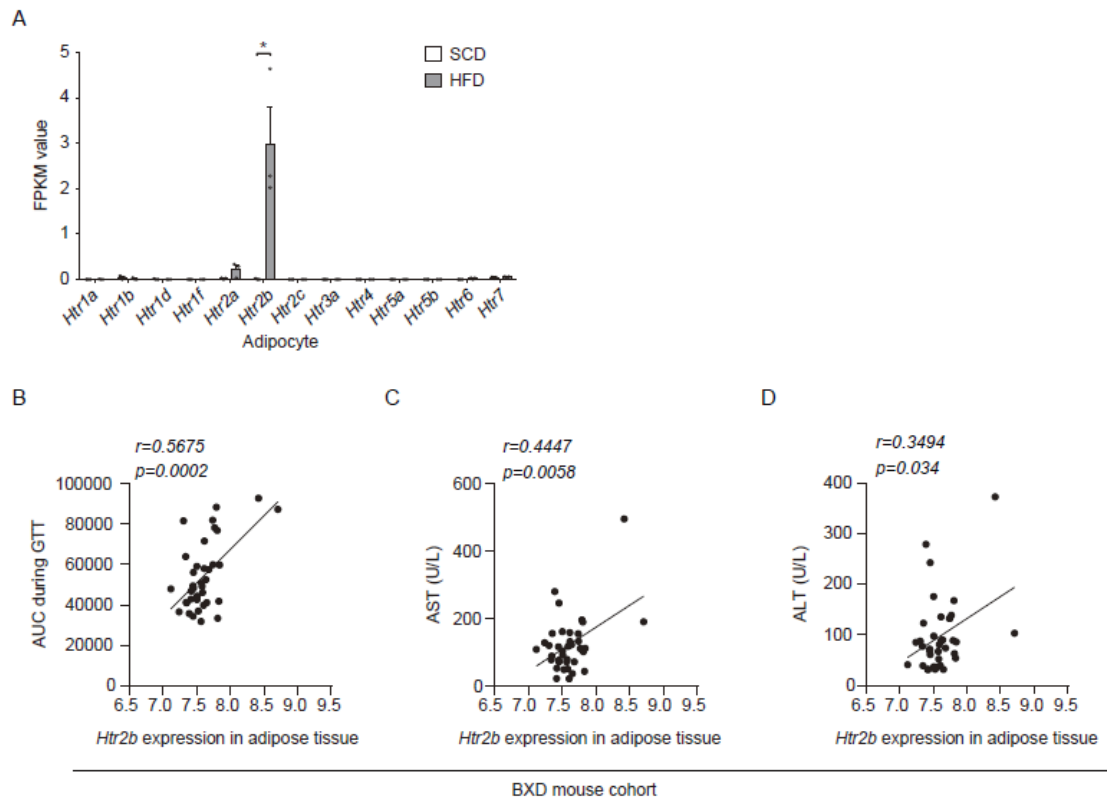

**Supplemental Figure 1. *Htr2b* expression was increased in visceral adipose tissue upon HFD.**

(A) FPKM values of *Htrs* in adipocytes isolated from eWAT of SCD- or HFD-fed 17-week-old C57BL/6J mice ( $n = 3/\text{group}$ ), as assessed by RNA-seq (GEO accession number: GSE129665). (B–D) (Related to Figure 1G) Correlation of *Htr2b* expression in WAT with AUC during GTT in HFD (B), AST level in HFD (C), and ALT level in HFD (D). Pearson's  $r$  correlation coefficient with corresponding  $p$  values. Data were expressed as means  $\pm$  SEM ( $*P < 0.05$ , Student's  $t$ -test [A]).

Supplemental Figure 2.

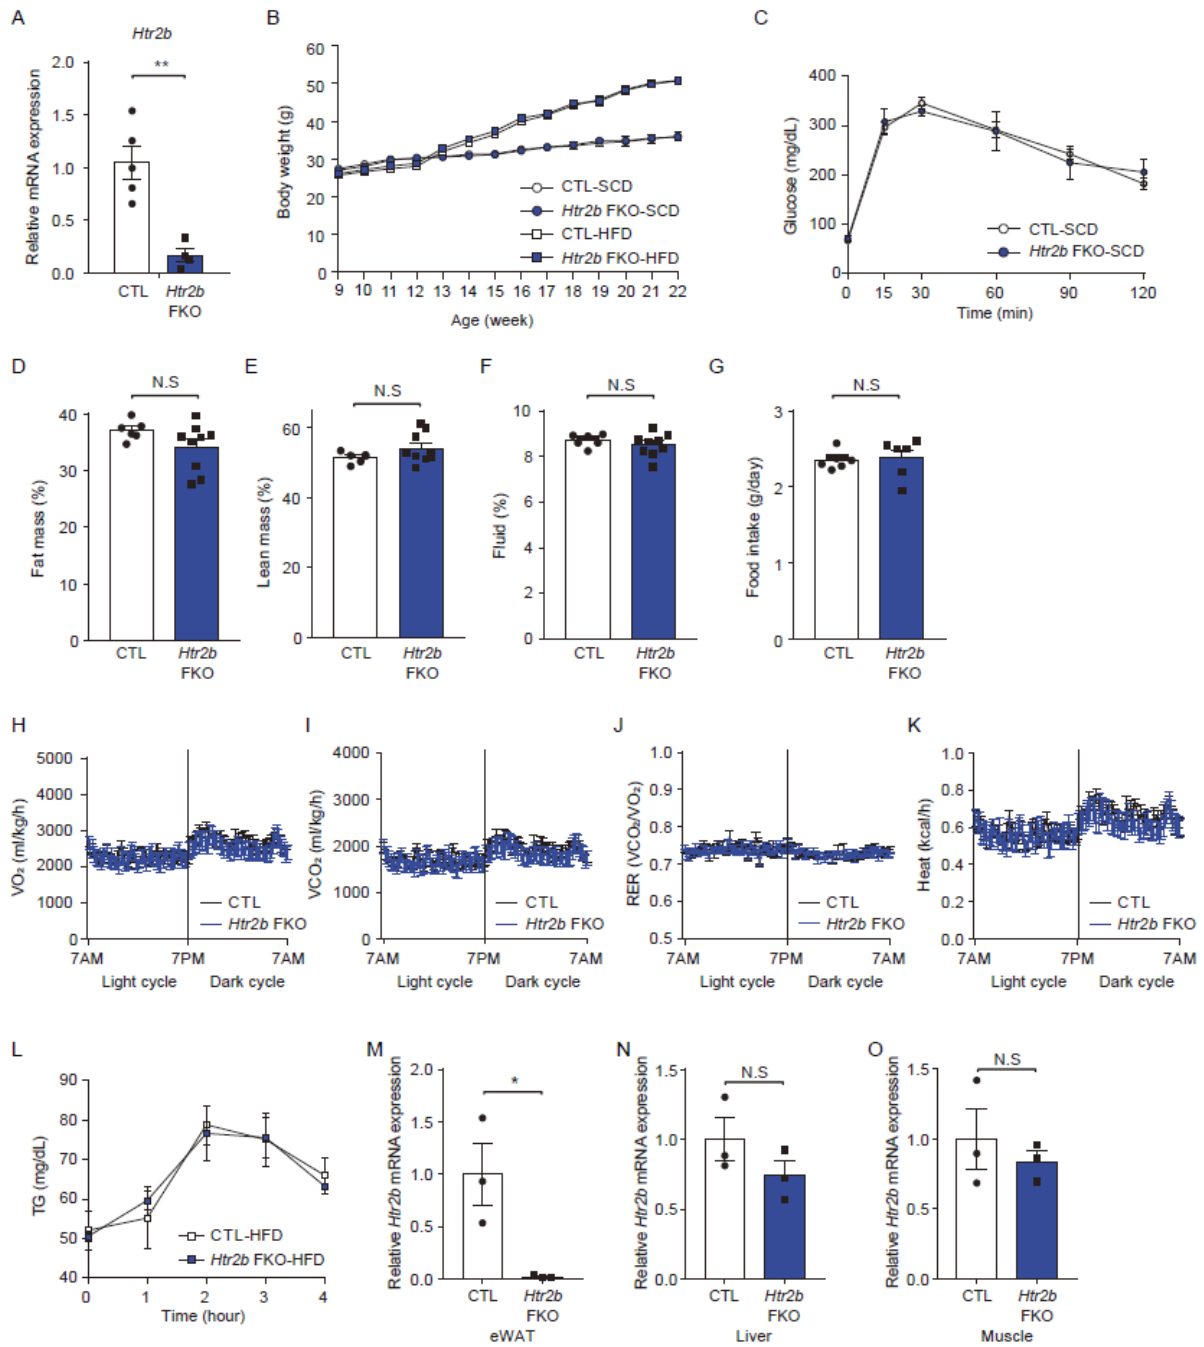

Supplemental Figure 2. Metabolic phenotypes of *Htr2b* FKO mice.

(A) *Htr2b* mRNA expression in adipocytes isolated from eWAT of HFD-fed control (n = 5) and *Htr2b* FKO (n = 4) mice, as assessed by qRT-PCR. (B and C) Twelve-week-old control and *Htr2b* FKO mice were fed a SCD or HFD for 10 weeks. (B) Body weight trends for control-SCD (n = 5), *Htr2b* FKO-SCD (n = 3), control-HFD (n = 11), and *Htr2b* FKO-HFD (n = 11)

mice. (C) Intraperitoneal glucose tolerance test (IPGTT) after a 16-hour fast in control-SCD (n = 9) and *Htr2b* FKO-SCD (n = 6) mice. (D–F) Percent fat body mass (D), lean body mass (E), and fluid mass (F) of HFD-fed control (n = 6) and *Htr2b* FKO (n = 9) mice. (G) Food intake of HFD-fed control and *Htr2b* FKO mice (n = 6/group for both). (H–K) Metabolic parameters of HFD-fed control and *Htr2b* FKO mice (n = 6/group for both). (L) Oral lipid tolerance test after 16-hour fast in HFD-fed control and *Htr2b* FKO mice (n = 7/group for both). (M–O) (Related to Figure 3, F–H) *Htr2b* mRNA expression in eWAT (M), liver (N), and skeletal muscle (O) of HFD-fed control and *Htr2b* FKO mice, as assessed by qRT-PCR (Control, n = 3; *Htr2b* FKO, n = 3). Data were expressed as means ± SEM (( $*P < 0.05$ ,  $**P < 0.01$ , Student's *t*-test [A–O]).

### Supplemental Figure 3.

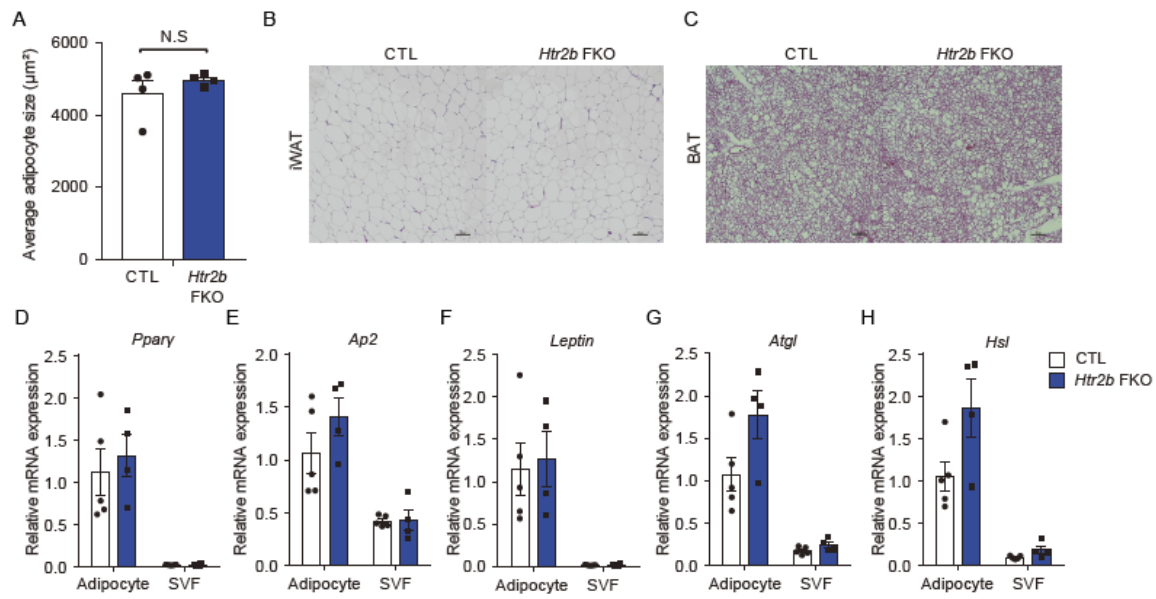

### Supplemental Figure 3. Adipose tissue phenotypes of *Htr2b* FKO mice.

(A) Average adipocyte size in eWAT from HFD-fed control and *Htr2b* FKO mice ( $n = 4$  mice/group for both, 5 images per mouse). (B and C) Representative histology of iWAT (B) and BAT (C) from HFD-fed control and *Htr2b* FKO mice, as assessed by H&E staining. Scale bars, 100  $\mu\text{m}$ . (D–H) Relative mRNA expression of genes involved in adipogenesis (D–F) or lipolysis (G and H) in adipocytes and SVF isolated from eWAT, as assessed by qRT-PCR (Control,  $n = 5$ /group; *Htr2b* FKO,  $n = 4$ /group). Data were expressed as means  $\pm$  SEM (Student's *t*-test [A, D–H]).

Supplemental Figure 4.

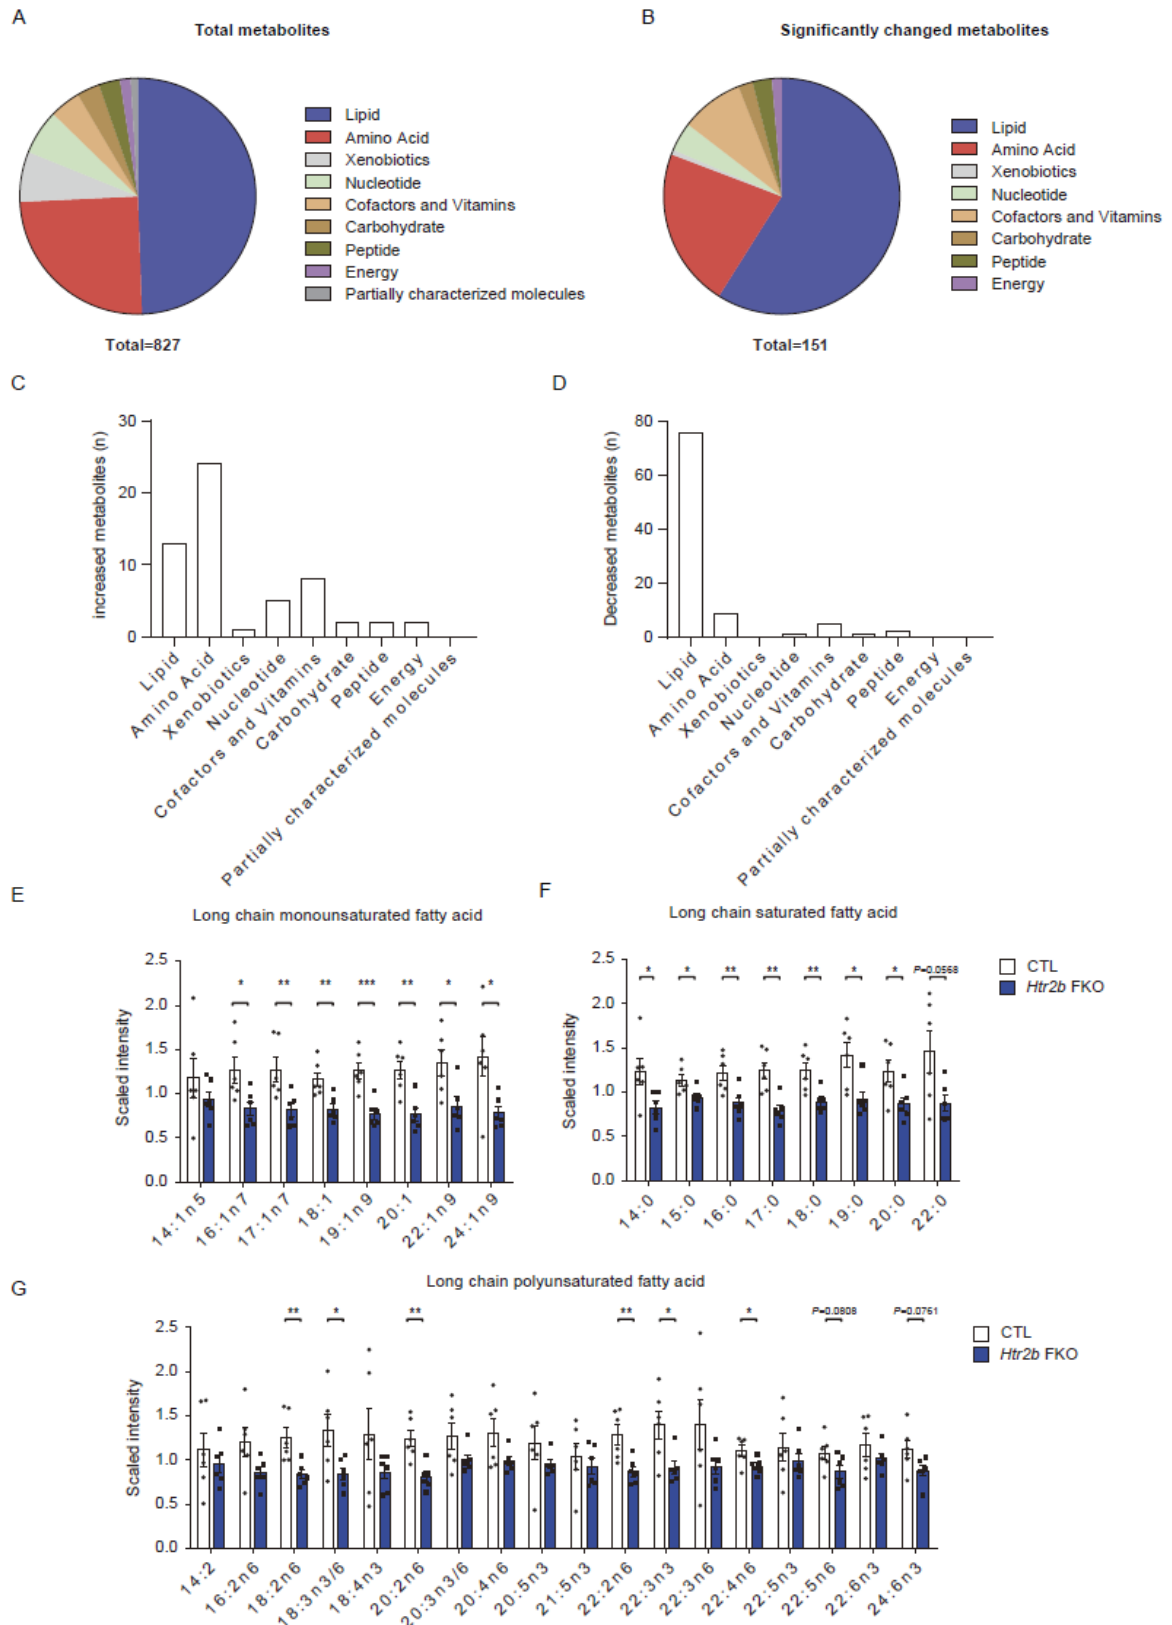

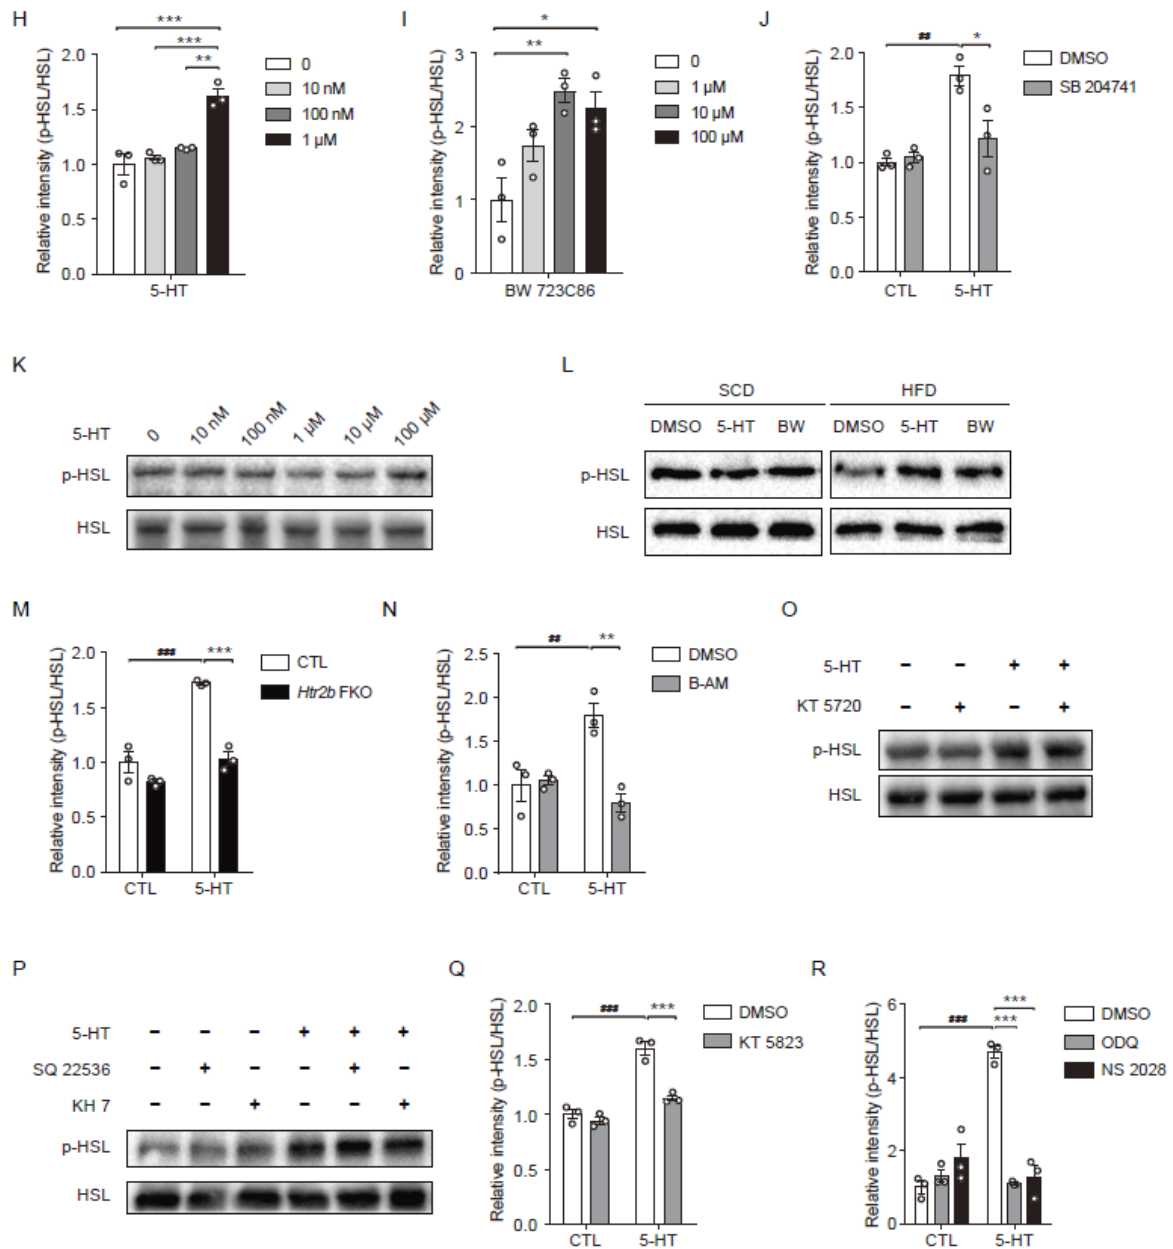

### Supplemental Figure 4. Metabolomics analysis and underlying mechanism of adipose HTR2B.

(A–G) Twelve-week-old control and *Htr2b* FKO mice were fed a HFD for 10 weeks. Global metabolomics profiling was performed on plasma. (A and B) Pathway categories of the 827 detected metabolites (A) and 151 significantly changed metabolites (B). (C and D) Pathway categories of significantly increased (C) or decreased (D) metabolites. (E–G) Relative

abundance of long-chain monounsaturated FAs (E), long-chain saturated FAs (F), and long-chain polyunsaturated FAs (G) in plasma (n = 6/group for both). (H–J, M, N, Q, R) Quantification of relative pHSL/HSL ratio using adipocytes isolated from eWAT of HFD-fed mice. (H and I) (Related to Figure 5, C and D) Treatment with different concentrations of 5-HT (H) or BW 723C86 (I) for 15 minutes. (J) (Related to Figure 5E) Treatment with 1  $\mu$ M 5-HT for 15 minutes, with or without pretreatment for 30 minutes with 10  $\mu$ M SB 204741. (K) Western blot showing concentration-dependent 5-HT-induced changes in HSL phosphorylation after a 15-minute treatment of primary adipocytes isolated from iWAT of HFD-fed mice. (L) Western blot showing HSL phosphorylation in adipocytes isolated from eWAT of SCD- or HFD-fed mice after treatment with 1  $\mu$ M 5-HT or 10  $\mu$ M BW 723C6 for 15 minutes. (M) (Related to Figure 5G) Treatment with 4  $\mu$ g/kg 5-HT (i.p.) for 15 minutes. (N) (Related to Figure 5H) Treatment with 1  $\mu$ M 5-HT for 15 minutes, with pretreatment with 1  $\mu$ M BAPTA-AM for 30 minutes. (O and P) Western blot showing HSL phosphorylation in primary adipocytes isolated from eWAT of HFD-fed mice after treatment with 1  $\mu$ M 5-HT for 15 minutes, with 1  $\mu$ M KT 5720 (PKA inhibitor) (O) or 10  $\mu$ M SQ 22536 (AC inhibitor) and 10  $\mu$ M KH 7 (AC inhibitor) (P) pretreatment for 30 minutes. (Q) (Related to Figure 5I) Treatment with 1  $\mu$ M 5-HT for 15 minutes, with pretreatment with 1  $\mu$ M KT 5823 for 30 minutes. (R) (Related to Figure 5J) Treatment with 1  $\mu$ M 5-HT for 15 minutes, with pretreatment with 10  $\mu$ M ODQ and 10  $\mu$ M NS 2028 for 30 minutes. Data were expressed as means  $\pm$  SEM (\* $P$  < 0.05, ##, \*\* $P$  < 0.01, ###, \*\*\* $P$  < 0.001, Student's  $t$ -test [E–G], one-way ANOVA with *post-hoc* Tukey's test [H, I], or two-way ANOVA with *post-hoc* Tukey's test [J, M, N, Q, R]).



Supplemental Figure 5.

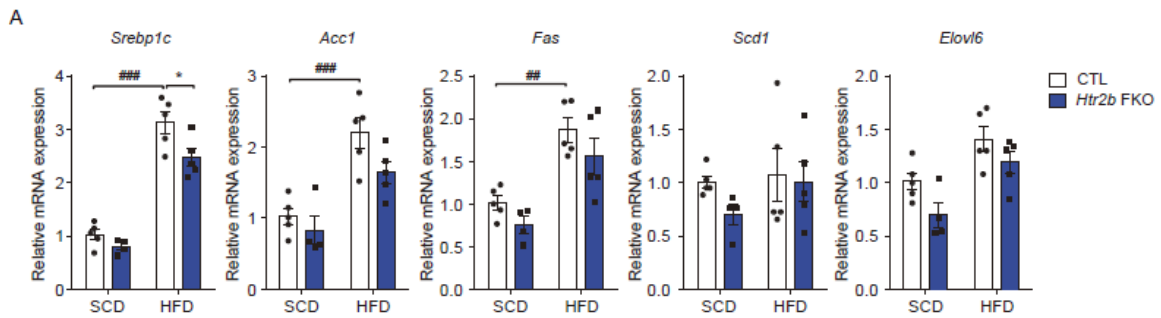

**Supplemental Figure 5. Relative expression of mRNA for genes involved in *de novo* lipogenesis in the liver of *Htr2b* FKO mice.**

Twelve-week-old control and *Htr2b* FKO mice were fed a SCD or HFD for 10 weeks. (A) Relative expression of mRNA for genes involved in *de novo* lipogenesis in liver. Data were expressed as means  $\pm$  SEM (## $P < 0.01$ , ### $P < 0.001$ , two-way ANOVA with *post-hoc* Tukey's test [A]).

Supplemental Figure 6.

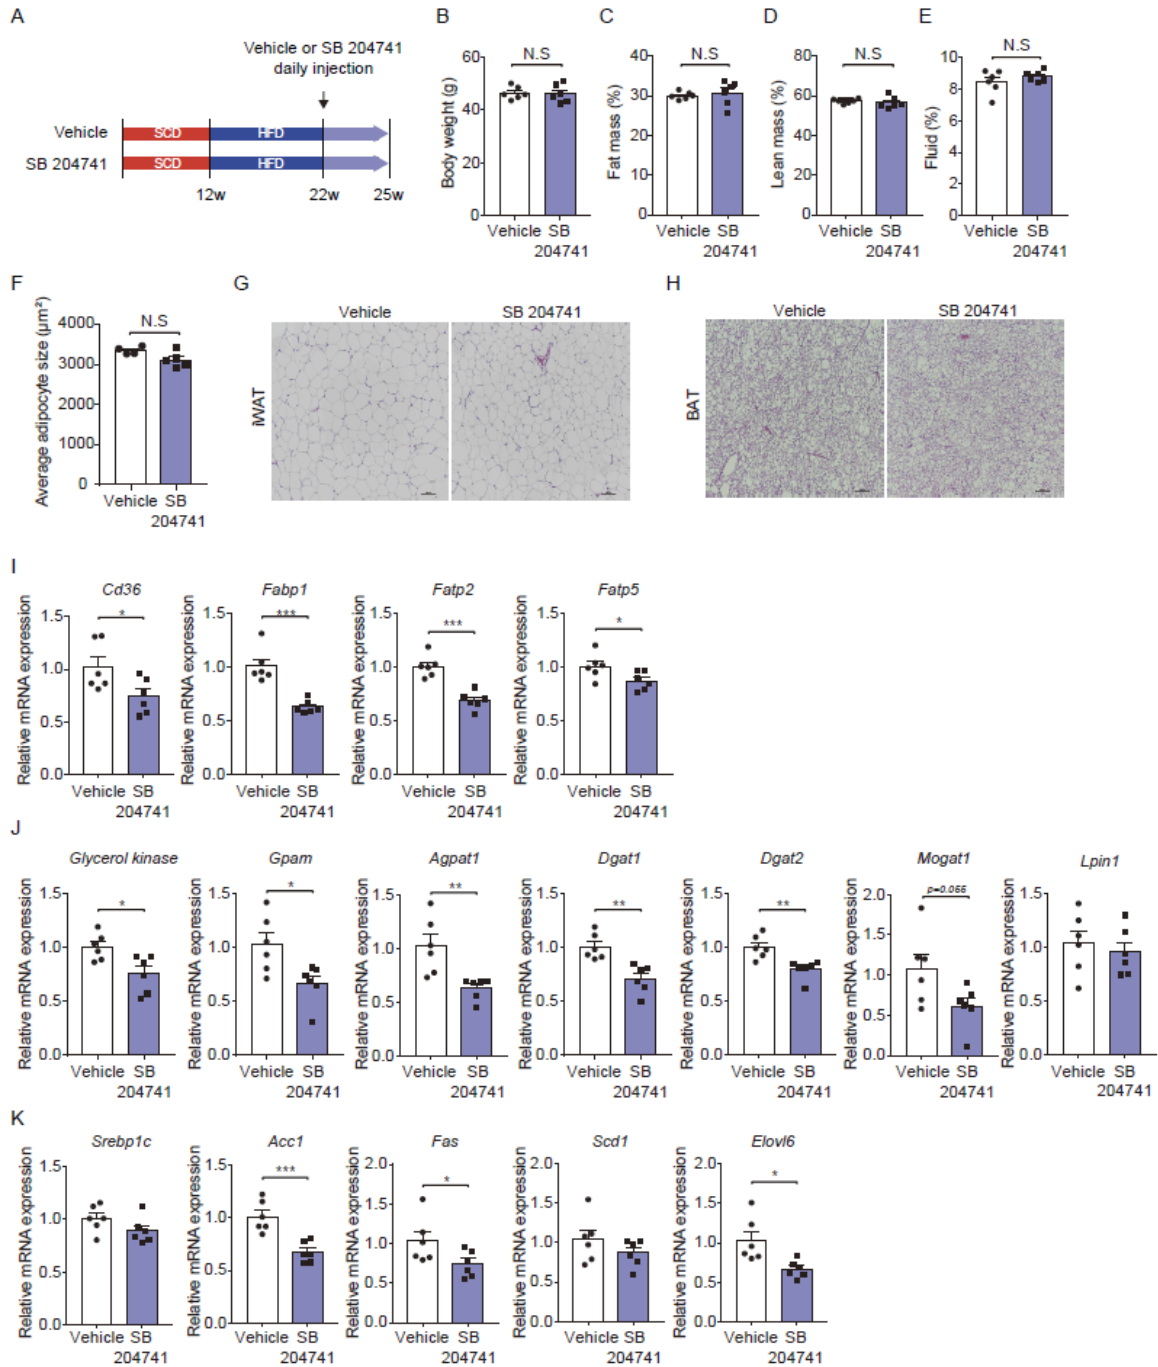

Supplemental Figure 6. Metabolic phenotypes of HTR2B antagonism on obese mice.

(A–K) Twelve-week-old mice were fed a HFD for 10 weeks and treated with vehicle or SB 204741 daily via intraperitoneal injection for 3 weeks while continuing HFD feeding. (A)

Experimental scheme. (B) Body weight (n = 6/group). (C–E) Percent fat body mass (C), lean body mass (D), and fluid mass (E) (n = 6/group). (F) Average adipocyte size in eWAT (Vehicle, n = 4; SB 204741, n = 5, 5 images per mouse). (G and H) Representative iWAT (G) and BAT (H) histology, as assessed by H&E staining. Scale bars, 100  $\mu$ m. (I–K) Relative expression of mRNA for genes involved in FA uptake (I), TG synthesis (J) and *de novo* lipogenesis (K) in the liver, as assessed by qRT-PCR (n = 6/group). Data were expressed as means  $\pm$  SEM (\**P* < 0.05, \*\**P* < 0.01, \*\*\**P* < 0.001, Student's *t*-test [B–F, I–K]).

Supplemental Figure 7.

A

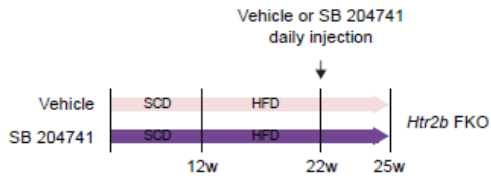

B

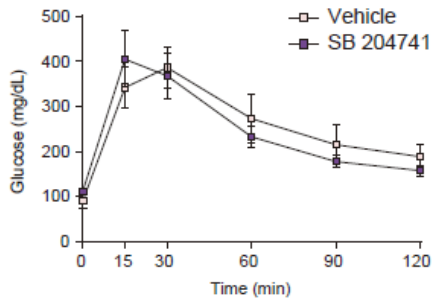

C

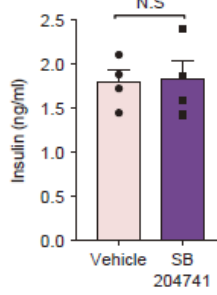

D

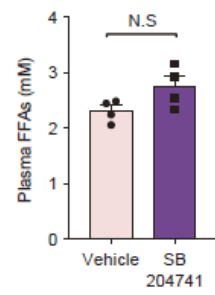

E

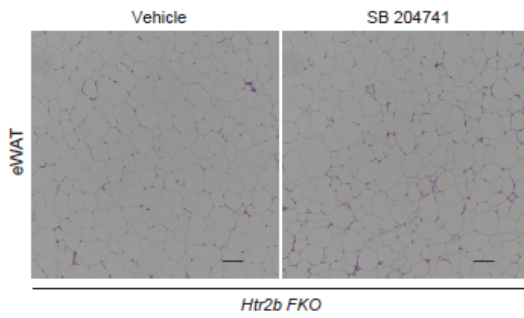

F

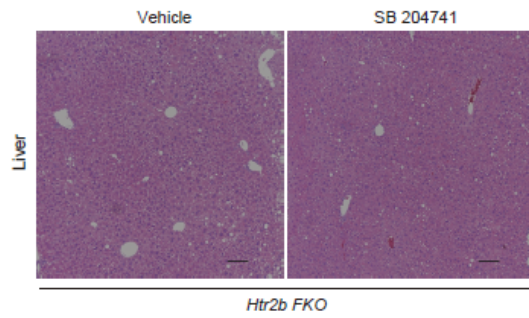

G

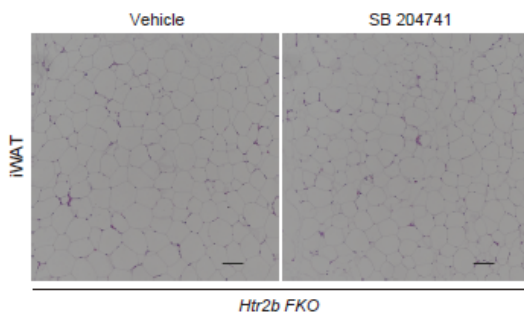

H

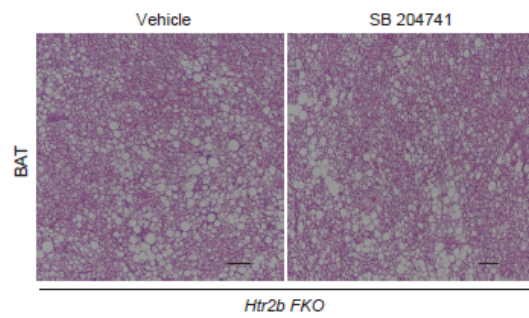

**Supplemental Figure 7. Protective effect of SB 204741 is adipocyte specific mechanism in metabolic dysfunction.** (A) Experimental scheme. (B–H) Twelve-week-old *Htr2b* FKO mice

were fed a HFD for 10 weeks and treated with vehicle or SB 204741 daily via i.p. injection for 3 weeks while continuing HFD feeding. (B) IPGTTs of HFD-fed vehicle (n = 4) and SB 204741 (n = 5) treated *Htr2b* FKO mice. (C) Plasma insulin levels in HFD-fed *Htr2b* FKO mice treated with vehicle or SB 204741 (n = 4/group). (D) Plasma FFA levels (n = 4/group). (E–H) Representative histology of eWAT (E), liver (F), iWAT (G) and BAT (H) in HFD-fed *Htr2b* FKO mice treated with vehicle or SB 204741, as assessed by H&E staining. Scale bars, 100  $\mu$ m. Data were expressed as means  $\pm$  SEM (Student's *t*-test [B-D]).

**Supplemental Table 1. Resource table.**

| <b>Reagent or resource</b>                          | <b>Source</b>          | <b>Identifier</b>        |
|-----------------------------------------------------|------------------------|--------------------------|
| <b>Antibodies</b>                                   |                        |                          |
| Anti-HSL                                            | Cell Signaling         | 4107S                    |
| Anti-p-HSL (660)                                    | Cell Signaling         | 4126S                    |
| Anti-AKT                                            | Cell Signaling         | 9272S                    |
| Anti-AKT (473)                                      | Cell Signaling         | 9271S                    |
| Anti-beta actin<br>(HRP conjugation)                | Cell Signaling         | 5125S                    |
| Anti-F4/80                                          | Abcam                  | Ab16911                  |
| Anti-perilipin                                      | Fitzgerald             | 20R-PP004                |
| FITC-conjugated goat anti-rat<br>antibody           | Jackson ImmunoResearch | 112-095-167              |
| TRITC-conjugated goat anti-<br>guinea pig antibody  | Jackson ImmunoResearch | 106-025-003              |
| Anti-mouse IgG, HRP-linked<br>antibody              | Cell Signaling         | 7076P2                   |
| Anti-rabbit IgG, HRP-linked<br>antibody             | Cell Signaling         | 7074P2                   |
| <b>Chemicals, Peptides and Recombinant proteins</b> |                        |                          |
| TRIzol reagent                                      | Ambion                 | 15596-018                |
| Collagenase type II                                 | Worthington            | LS004176                 |
| BSA (western blot)                                  | Sigma-Aldrich          | 1.08E+10                 |
| HBSS                                                | Welgene                | LB003-02                 |
| DMEM high glucose                                   | Hyclone                | SH30243.01               |
| Penicillin/streptomycin                             | Hyclone                | SV30010                  |
| Human insulin                                       | Roche                  | 11376497001              |
| Isopropyl alcohol                                   | Merck                  | 1.09634.2511             |
| Formalin                                            | Sigma-Aldrich          | HT501640                 |
| Calf serum                                          | Gibco                  | 16170-078                |
| Fetal bovine serum                                  | Gibco                  | 16000-044                |
| Reverse transcriptase                               | ABI                    | 4368813                  |
| Triton X-100                                        | Sigma-Aldrich          | T8787                    |
| Paraformaldehyde                                    | Sigma-Aldrich          | 158127                   |
| Goat or donkey serum                                | Jackson ImmunoResearch | 005-000-121, 017-000-121 |
| DAPI                                                | Sigma-Aldrich          | D9542                    |
| Glucose Injection 20% Daihan                        | Dai Han Pharm          | 645100954                |

|                                                      |                    |             |
|------------------------------------------------------|--------------------|-------------|
| NP-40                                                | Sigma-Aldrich      | 74385       |
| RIPA buffer                                          | Pierce             | 89901       |
| Protease and phosphatase inhibitors                  | Thermo             | 78440       |
| BCA Protein Assay Kit                                | Pierce             | 23228       |
| Polyvinylidene difluoride membrane                   | Millipore          | IPVH00010   |
| Glycerol reagent                                     | Sigma-Aldrich      | F6428       |
| Fatty acid-free BSA                                  | Roche              | 10775835001 |
| Triglyceride Reagent                                 | Sigma-Aldrich      | T2449       |
| HTR2B antagonist (SB 204741)                         | R&D Systems        | 1372        |
| ODQ                                                  | Tocris             | 0880        |
| NS 2028                                              | Tocris             | 4517        |
| Serotonin                                            | Sigma-Aldrich      | 14927       |
| KT 5823                                              | Tocris             | 1289        |
| BAPTA-AM                                             | Sigma              | A1076       |
| SQ 22536                                             | Tocris             | 1435        |
| KH 7                                                 | Tocris             | 3834        |
| KT 5720                                              | Tocris             | 1288        |
| HTR2B agonist (BW 723C86)                            | Tocris             | 1059        |
| Teklad global 18% protein rodent diet (sterilizable) | ENVIGO             | 2018S       |
| Rodent diet with 60 kcal% fat                        | Research Diets     | D12492      |
| <b>Software</b>                                      |                    |             |
| Prism 7                                              |                    |             |
| AdipoCount                                           |                    |             |
| QuantStudio™ Software V1.2.4                         | Applied Biosystems |             |
| Image Lab (Chemi-doc)                                | Bio-Rad            |             |
| <b>Hyperinsulinemic-euglycemic Clamp</b>             |                    |             |
| Small animal one flow (O2) Anesthesia system         | L.M.S. KOREA       | L-PAS-01    |
| Microdialysis Syringe Pump                           | Harvard Apparatus  | CMA/102     |

|                                              |                        |               |
|----------------------------------------------|------------------------|---------------|
| Glucose analyzer                             | Analox Instruments     | GM9           |
| Liquid scintillation counter                 | Perkin Elmer           | Tri-carb 4910 |
| Vacuum oven                                  | JEIO TECH              | OV-11         |
| Cold trap bath                               | JEIO TECH              | CTB-10        |
| Vacuum pump                                  | WOOSUNG VACUUM         | MVP6          |
| Fiber optic illuminator                      | Olympus                | LG-PS2        |
| Heating pad                                  | JEUNG DO BIO           | JD-OT-06      |
| 2-Deoxy-D-[1-14C] glucose                    | Perkin Elmer           | NEC-495-1     |
| [3-3H] glucose                               | Perkin Elmer           | NET-331C-3    |
| Ultima Gold                                  | Perkin Elmer           | 3013329       |
| Humulin R                                    | Lilly                  | HI-210        |
| 20% Dextrose                                 | Daihan                 |               |
| Isotonic sodium chloride                     | Daihan                 |               |
| Poly-Prep prefilled chromatography columns   | Bio-Rad                | #7316211      |
| Barium hydroxide solution                    | Sigma                  | B4059         |
| Zinc sulfate solution                        | Sigma                  | Z2876         |
| Ammonium acetate                             | Sigma                  | A1542         |
| Formic acid                                  | Sigma                  | 695076        |
| Heparin sodium                               | Hanlim Pharm           | P31075-15     |
| I-Fran liquid                                | Hana Pharm             | 200711400     |
| Mouse Insulin ELISA                          | Merck Millipore        | EZRMI-13K     |
| Icc syringe                                  | BD                     | REF301321     |
| 30G needle                                   | Jungrim                | JRN-30G       |
| Silicone tubing                              | HelixMark              | REF 60-011-01 |
| Micro-Hematocrit Capillary Tubes Heparinized | Kimble                 | 41B2501       |
| Surgical sutures                             | B. Braun               | C0762121      |
| Gauze                                        | Daehan Medical Systems | DHG-338B      |



**Supplemental Table 2. qPCR primer sequence.**

| Mouse Gene      | Forward                         | Reverse                     |
|-----------------|---------------------------------|-----------------------------|
| Htr2a           | CGTGTCCATGTTAACCATCCT           | ACTGGGATTGGCATGGATATAC      |
| Htr2b           | ATTGCCCTCTTGACAATCATGT          | GGAATAACCAGGCAGGACAC        |
| 36B4            | GAGGAATCAGATGAGGATATGGGA        | AAGCAGGCTGACTTGGTTGC        |
| iNOS            | CACCTTGGAGTTCACCCAGT            | ACCACTCGTACTTGGGATGC        |
| Lpl             | GTGGCCGAGAGCGAGAAC              | AAGAAGGAGTAGGTTTTATTTGTGGAA |
| Mogat1          | TTGACCCATGGTGCCAGTTT            | GTGGCAAGGCTACTCCCATT        |
| Dgat1           | GGATCTGAGGTGCCATCGTC            | ATCAGCATCACCACACACCA        |
| Dgat2           | CATCATCGTGGTGGGAGGTG            | TGGGAACCAGATCAGCTCCAT       |
| Cd36            | TGGCCAAGCTATTGCGACAT            | ACACAGCGTAGATAGACCTGC       |
| Glycerol kinase | TGAACCTGAGGATTTGTCAGC           | CCATGTGGAGTAACGGATTTCG      |
| TNF $\alpha$    | CTGAACTTCGGGGTGATCGG            | GGCTTGTCACTCGAATTTTGAGA     |
| IL-1 $\beta$    | TGCCACCTTTTGACAGTGAT            | GATTTGAAGCTGGATGCTCT        |
| F4/80           | CTTTGGCTATGGGCTTCCAGTC          | GCAAGGAGGACAGAGTTTATCGTG    |
| Adiponectin     | TCCTGGAGAGAAGGGAGAGAAAG         | CAGCTCCTGTCAATCCAACATC      |
| Ppar $\gamma$   | TTTAAAAACAAGACTACCCTTTACTGAAATT | AGAGGTCCACAGAGCTGATTCC      |
| Ap2             | GCGTGGAATTCGATGAAATCA           | CCCGCCATCTAGGGTTATGA        |
| Leptin          | ACACACGCAGTCGGTATCC             | GCAGCACATTTTGGGAAGGC        |
| Atgl            | TAGGAGGAATGGCCTACTGAA           | GGCTGCAATTGATCCTCCTCT       |
| Hsl             | GCAGTGGTGTGTAAGTAGGAT           | CGCTGAGGCTTTGATCTTGC        |
| Srebp1c         | GGAGCCATGGATTGCACATT            | GGCCCGGAAGTCACTGT           |
| Acc1            | CAGTAACCTGGTGAAGCTGGA           | GCCAGACATGCTGGATCTCAT       |
| Fas             | CCTGGACTCGCTCATGGGT             | ATTCCTGAAGTTTCCGCAGC        |
| Scd1            | CCTGCGGATCTTCCTTATCATT          | GATCTCGGGCCCATTCG           |
| Elovl6          | CAGCAAAGCACCCGAACATA            | AGGAGCACAGTGATGTGGTG        |
| Fabp1           | TGAAGGCAATAGGTCTGCCC            | GTCATGGTCTCCAGTTCGCA        |
| Fatp2           | CTTCGGGAACCACAGGTCTTC           | CATAGCAAGGCTGTCCCATAC       |
| Fatp5           | TTCGAAAGAACCAACCCTTCT           | GCGTCGTACATTCGCAACAA        |

|             |                      |                         |
|-------------|----------------------|-------------------------|
| Gpam        | CCACAGAGCTGGGAAAGGTT | GTGCCTTGTGTGCGTTTCAT    |
| Agpat1      | GCGCAATGTCGAGAACATGA | TCATTCCAAGCAGGTTCGAGG   |
| Lpin1       | CATACAAAGGCAGCCACACG | CGGGGTTCAGTCCCTTGTAG    |
| Human Gene  | Forward              | Reverse                 |
| HTR2A       | AGCAAGCTTTGTGCAGTCTG | ACAAAGTTATCATCGGCGAGTAA |
| HTR2B       | AACTCACGGGCTACAGCATT | GTGTGAAGAAGGCAGCCAGT    |
| Cyclophilin | TCTGCACTGCCAAGACTGAG | TCGAGTTGTCCACAGTCAGC    |

**Supplemental Table 3. Baseline characteristics of enrolled human subjects.**

|                 | Normal        | Obese non-DM  | Obese DM       | P-value           |               |
|-----------------|---------------|---------------|----------------|-------------------|---------------|
|                 | (N = 10)      | (N = 9)       | (N = 9)        | Normal vs. non-DM | Normal vs. DM |
| Age             | 36.8 ± 13.02  | 33.22 ± 8.91  | 38.78 ± 12.27  | 0.6251            | 0.7382        |
| BMI             | 21.91 ± 2.42  | 38.95 ± 4.46  | 41.97 ± 9.61   | < 0.0001          | < 0.0001      |
| Glucose (mg/dL) | 118.2 ± 19.98 | 95.89 ± 9.09  | 161.44 ± 59.98 | 0.0069            | 0.0456        |
| HbA1c (%)       |               | 5.5 ± 0.35    | 8.41 ± 2.19    | 0.0012            |               |
| BUN             | 12.1 ± 3.21   | 13.89 ± 4.65  | 13.88 ± 2.42   | 0.3386            | 0.2140        |
| Cr              | 1.12 ± 0.2    | 0.87 ± 0.31   | 0.83 ± 0.09    | 0.0468            | 0.0014        |
| AST             | 25.4 ± 8.4    | 44.33 ± 20.76 | 42.89 ± 17.29  | 0.0165            | 0.0110        |
| ALT             | 17.2 ± 7.84   | 95 ± 61.41    | 67.78 ± 22.29  | 0.0009            | < 0.0001      |

DM, Diabetes mellitus; BMI, body mass index; HbA1c, glycated hemoglobin; BUN, blood urea nitrogen; Cr, creatinine; AST, aspartate aminotransferase; ALT, alanine aminotransferase.
